# Supplementary material for: Controlled growth of SnO2@Fe2O3 double-sided nanocombs as anodes for lithium-ion batteries
Source: Royal Society of Chemistry journal article supplement (doi:10.1039/c2nr31239e), 2012-01-01
Supplement: c2nr31239e.pdf [file c2nr31239e.pdf]

Supporting Information for

## **Controlled Growth of SnO<sub>2</sub>@Fe<sub>2</sub>O<sub>3</sub> Double-sided Nanocombs as Anodes for Lithium-Ion Batteries**

Weiwei Zhou,<sup>a</sup> Yee Yan Tay,<sup>b</sup> Xingtao Jia,<sup>a</sup> Denis Yu Yau Wai,<sup>c</sup> Jian Jiang,<sup>a</sup> Huey Hoon Hng,<sup>b</sup> and Ting Yu<sup>a,c,d,\*</sup>

<sup>a</sup> *Division of Physics and Applied Physics, School of Physical and Mathematical Sciences, Nanyang Technological University, 21 Nanyang Link, 637371 Singapore.*

<sup>b</sup> *School of Materials Science and Engineering, Nanyang Technological University, 639798 Singapore.*

<sup>c</sup> *Energy Research Institute @ NTU (ERIAN), 50 Nanyang Drive, 637553 Singapore.*

<sup>d</sup> *Department of Physics, Faculty of Science, National University of Singapore, 117576 Singapore .*

\* Address correspondence to [yuting@ntu.edu.sg](mailto:yuting@ntu.edu.sg)

## Experimental

**Synthesis:** The SnO<sub>2</sub>@Fe<sub>2</sub>O<sub>3</sub> double-sided nanocombs were prepared by a simple two-step process, which can be easily scaled up. The Fe<sub>2</sub>O<sub>3</sub> nanoflakes were firstly synthesized by heating the polished (by sand paper) and cleaned (with distilled water) Fe foil (Aldrich, 0.1 mm thick, 99.9+ %) on a hotplate at 400 °C for 24 h in air. Then, a piece of as-obtained Fe foil covered by Fe<sub>2</sub>O<sub>3</sub> nanoflakes was placed in a 50 mL sealed Teflon autoclave filling with 30 mL aqueous solution containing 0.174 g of SnCl<sub>4</sub> · 2H<sub>2</sub>O and 0.534 g of NaOH. After growing at 220 °C for 3 h, the substrate was removed from the solution, rinsed with distilled water, and dried with N<sub>2</sub> blow.

**Material Characterization:** Samples were characterized by powder X-ray diffraction (XRD) (Bruker D-8 Avance), scanning electron microscopy (SEM) (JSM-6700F, 10.0 kV), transmission electron microscopy (TEM) (JEM-2010, 200 kV).

**Electrochemical Characterization:** Electrochemical measurements were performed using two-electrode CR2016 coin-type cells with lithium foil serving as both counter and reference electrodes at room temperature. The SnO<sub>2</sub>@Fe<sub>2</sub>O<sub>3</sub> nanocombs on Fe foil were directly used as working electrode. Besides, the Fe<sub>2</sub>O<sub>3</sub> nanoflakes on Fe foil were also tested for comparison. The electrolyte used was 1.0 M LiPF<sub>6</sub> in a mixture of ethylene carbonate and diethyl carbonate (1:1 by volume). Cell assembly was carried out in an argon-filled glovebox with both moisture and oxygen contents below 0.1 ppm. Galvanostatic charge/discharge tests were performed using a NEWARE battery tester at a voltage window of 0.005–3 V. Cyclic voltammetry (CV, 0.005–3 V, 0.5 mV s<sup>-1</sup>) and Impedance measurement (0.1-30000 Hz) were performed on the as-made cells using an electrochemical workstation (CHI 760D).

## Supplementary Figures

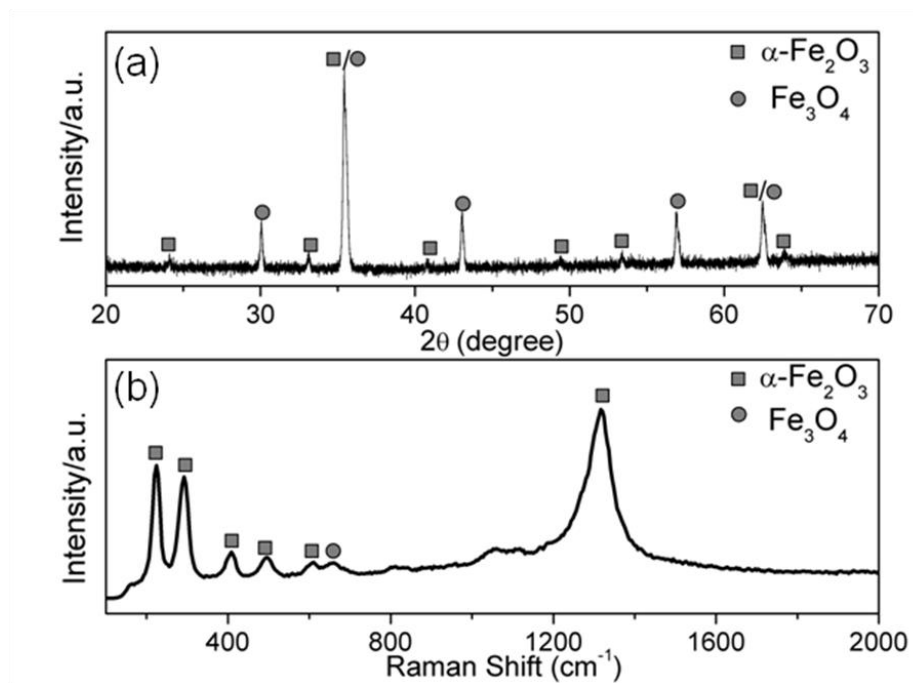

**Fig. S1.** (a) XRD pattern and (b) Raman spectrum of the as-obtained  $\text{Fe}_2\text{O}_3$  nanoflakes.

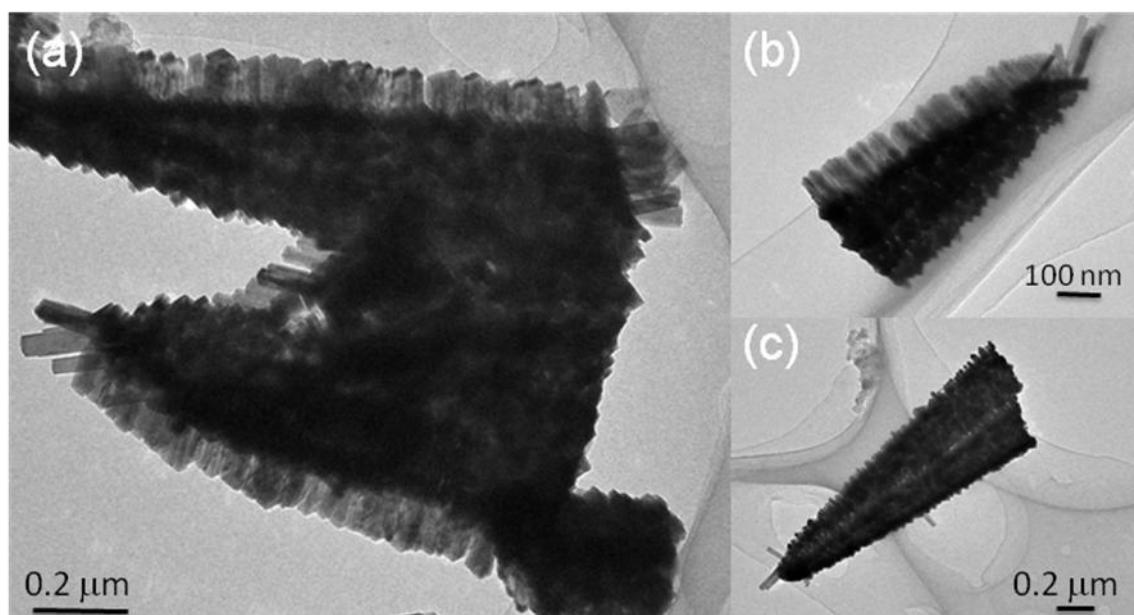

**Fig. S2.** TEM images of  $\text{SnO}_2@\text{Fe}_2\text{O}_3$  nanocombs after being sonicated for 0.5 h, suggesting the strong adherent forces between the  $\text{SnO}_2$  branches and  $\text{Fe}_2\text{O}_3$  cores.

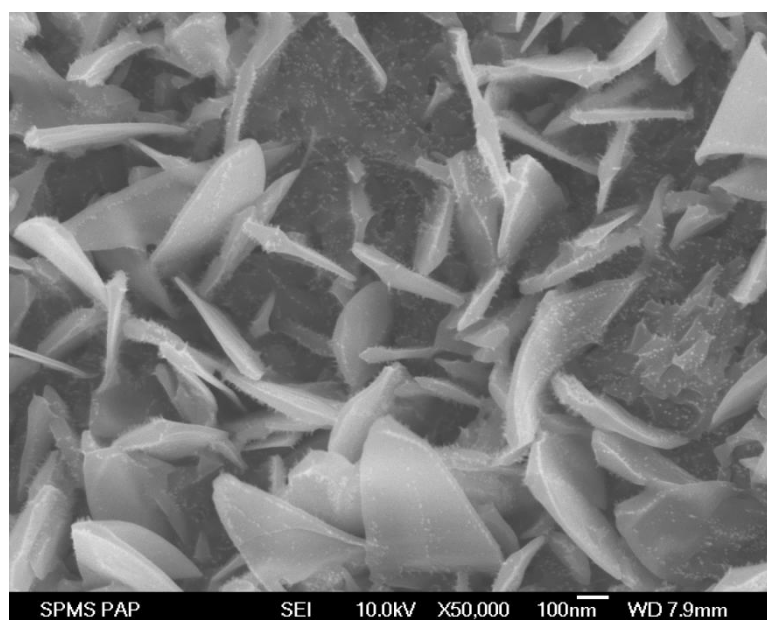

**Fig. S3.** SEM image of the product gained after 2 h of hydrothermal growth of  $\text{SnO}_2$  branches, showing the initial nuclei of  $\text{SnO}_2$ .

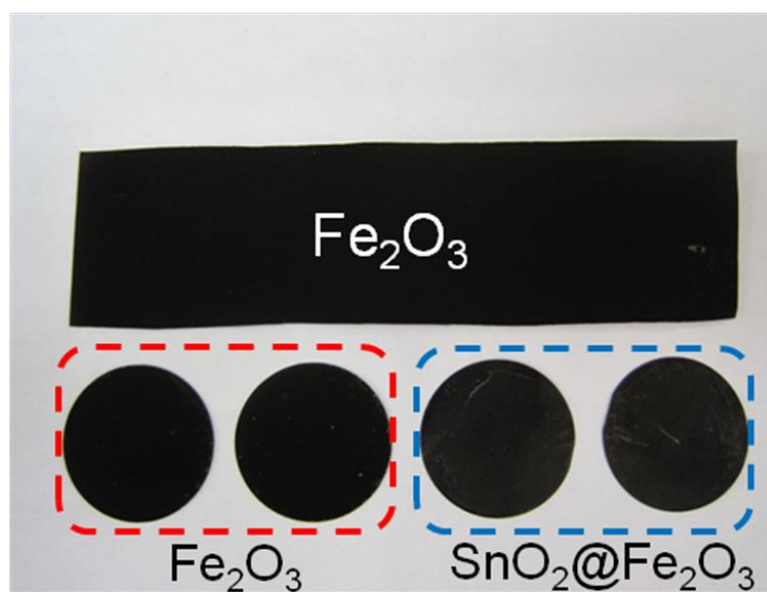

**Fig. S4.** Optical image of our samples, showing that the working electrodes, namely  $\text{Fe}_2\text{O}_3$  and  $\text{SnO}_2@\text{Fe}_2\text{O}_3$ , can be simply obtained by cutting the as-gained products into platelets with certain sizes.
